# Supplementary material for: Global risk transformative prioritization for prostate cancer candidate genes in molecular networks
Source: Royal Society of Chemistry journal article supplement (doi:10.1039/c1mb05134b), 2011-07-07
Supplement: c1mb05134b.pdf [file c1mb05134b.pdf]

## Supplemental file

Table 1 Twelve types of cancer and their known genes

| <i>Cancer</i>                             | <i>OMIM id</i> | <i>The symbol of known genes<sup>Δ</sup></i>                                                                                                 |
|-------------------------------------------|----------------|----------------------------------------------------------------------------------------------------------------------------------------------|
| Bladder Cancer                            | #109800        | BRCA1,CDH1,BRCA2,CHEK2,BRIP1,ESR1,TP53,RET ,RPS27A,UBB,UBC,TRAF2,TF                                                                          |
| Breast cancer                             | #114480        | TP53,ESR1,EGFR,CHEK2,AR,BRCA1,BRCA2,CDH1, BARD1,CRYAB,RAD51,TERT,MYC,ITGB3,INSR,ER BB2,JAK2,RPS27A,UBB,UBC,TRAF2,GRB2,ABL1,R B1,ZNF217, LRE4 |
| Esophageal carcinoma                      | #133239        | TP53,APC,CDKN2A,TF,RPS27A,UBB,UBC,GRB2,RP L4,HIST2H4A,YWHAZ,HIST1H4J,HIST1H4C,SMAD2                                                          |
| Glioma of brain                           | #137800        | APC,BRCA2,TP53,CDKN2A,CHEK2,HIST1H4I,HIST 1H4A,HIST1H4D,HIST1H4F,YWHAB,SMAD2,MYC, YEATS4                                                     |
| Hepataocellular carcinoma                 | #114550        | BRCA2,CDH1,CHEK2,TP53,ESR1,ALB,AQP9,CTNN B1,FN1,GNAS,HBB,IRS1,MSH6,NR5A1,RB1,RET,TG FBR2,TSHR                                                |
| Hereditary nonpolyposis colorectal cancer | #609310        | BRCA2,MLH1,MSH2,TGFBR2,TP53,ESR1                                                                                                             |
| Juvenile myelomonocytic leukemia          | #607785        | HRAS, PTPN11                                                                                                                                 |
| Lung cancer                               | #211980        | BRCA1,BRCA2,BRAF,ABCA1,CHEK2,TP53,ESR1,C DH1,HIST1H4A,HIST1H4D,HIST1H4J,HIST1H4C,CR YAB,NRAS,RB1,TERT,XPC,CD55,MEN1,PCSK9,NOS 3,NF1          |
| Medulloblastoma                           | #155255        | APC,BRCA2,CTNNB1,DMBT1,RB1,TP53,SUFU,PTC H2                                                                                                  |
| Pancreatic carcinoma                      | #260350        | ALB,BRCA2,CDH1,TP53,CLPTM1,GNAS,IRS1,HRAS ,NRAS,MSH6,HIST1H4I,MYC                                                                            |
| Prostate cancer                           | #176807        | RNASEL,ELAC2,MSR1,CHEK2,EPHB2,CDH1,BRCA 2,PTEN,MXI1,CD82,MAD1L1,KLF6,ATBF1,AR,HPC X,PCAP,HIP1                                                |
| Thyroid carcinoma                         | #188550        | PRKAR1A,RET,TG,TPR,TP53,TSHR,TPM3,NTRK1                                                                                                      |

<sup>Δ</sup> known disease genes that clearly associated with 12 types of cancers were collected from the Online Mendelian Inheritance in Man (OMIM) database. <sup>#</sup> A number sign (#) is used with this entry because of evidence that several genes are involved in the origin and/or progression of this neoplasm, which could be verified by the NCBI PubMed center.

Table2 Selected candidate genes of prostate cancer and their source

| <i>source</i>                                   | <i>Gene Symbol</i>                                                                                                                                                                                                                                                                                                                                                                                                                                                                                                                                                                                                                                                                                                                                                                                                                                                                                                                                                                                                                                                                                                                                                                                                                                                                                                                                                                                                                                                                                                                                                                                                                                                                                                                                                                                                                                                                                                                                                                                                                                                                                                                                                                  |
|-------------------------------------------------|-------------------------------------------------------------------------------------------------------------------------------------------------------------------------------------------------------------------------------------------------------------------------------------------------------------------------------------------------------------------------------------------------------------------------------------------------------------------------------------------------------------------------------------------------------------------------------------------------------------------------------------------------------------------------------------------------------------------------------------------------------------------------------------------------------------------------------------------------------------------------------------------------------------------------------------------------------------------------------------------------------------------------------------------------------------------------------------------------------------------------------------------------------------------------------------------------------------------------------------------------------------------------------------------------------------------------------------------------------------------------------------------------------------------------------------------------------------------------------------------------------------------------------------------------------------------------------------------------------------------------------------------------------------------------------------------------------------------------------------------------------------------------------------------------------------------------------------------------------------------------------------------------------------------------------------------------------------------------------------------------------------------------------------------------------------------------------------------------------------------------------------------------------------------------------------|
| the experimental dataset supported by Kim et al | ABCB1,ABCB5,ABCC2,ABCC5,ABCC6,ABCF3,ABHD1,ACAA2,ACADSB,ACIN1,ACLY,ACTA2,ACVR2B,ADHFE1,AEBP1,AGT,AGTR1,AGXT2,AKAP11,ALG3,ALOX5AP,AMD1,AMOTL2,AMPH,AMY1A,ANAPC13,ANGPT2,ANK3,ANKRA2,ANKRD1,ANKRD17,ANKRD31,ANKRD6,ANXA13,AOC2,AP1S1,APCS,APOB,APOD,ARF1,ARFGAP1,ARHGAP19,ARL4A,ARNT,ARV1,ASXL2,ATAD1,ATAD2,ATF6,ATP11B,ATP1A2,ATP1B3,ATP2C1,ATP5E,ATP5J2,ATP6V0A1,ATP6V1C1,ATP6V1C2,ATP7B,ATPAF1,ATR,B3GNT5,B4GALT3,BAALC,BAG4,BBX,BCL2,BCL2L2,BECN1,BLZF1,BMP7,BMPER,BMPR1A,BNIP3L,BRAF,BRF2,BTAF1,BTF3,BUB3,BVES,C10orf18,C10orf88,C13orf1,C13orf18,C14orf119,C1GALT1,C20orf11,C20orf177,C2orf18,C3orf1,C5orf4,C6,C6orf105,C6orf162,C6orf165,C7orf16,C7orf23,C7orf25,C7orf28B,C7orf36,C9orf5,CA13,CA2,CA8,CABLES2,CALB1,CASP2,CASP8AP2,CASR,CBX3,CCL13,CCL2,CCL7,CCNC,CCNE2,CCNG1,CCNJ,CCR6,CD160,CD1C,CD1D,CD47,CD48,CD5L,CD83,CD86,CDADC1,CDC14A,CDC2,CDC2L5,CDCA2,CDGAP,CDH19,CDH3,CDK7,CDKN2C,CDR2,CGA,CGREF1,CHN2,CHST2,CLDN1,CLDN11,CLN8,CNGB3,CNOT4,CNR1,CNTNAP1,COBRA1,COG2,COG3,COG6,COG7,COL4A3BP,COMMD2,COMMD5,COMMD6,COPB2,COPG2,COX15,COX6C,CP,CPA3,CPA4,CPA6,CPB2,CPN2,CPNE3,CPNE4,CPSF1,CREBL2,CRH,CRHBP,CROT,CRP,CSMD1,CSMD3,CSTF1,CTCF,CTDSPL,CTSC,CTSK,CXCL1,CYB5A,CYFIP2,CYP24A1,CYP26A1,CYP2C8,CYP2C9,CYP2J2,CYP4A11,CYP4B1,CYP4X1,DAB2,DACH1,DBC1,DCK,DCTN6,DDHD2,DDR2,DDX1,DDX56,DEXI,DFNA5,DGKI,DKFZP586I1420,DLEU1,DLG1,DMD,DNAH11,DNMBP,DNMT3A,DOCK2,DOCK5,DPEP2,DPP7,DPT,DPYS,DPYSL5,DRG1,DTNB,DUSP12,E2F5,EBPL,EDN3,EDNRB,EEF2K,EHHADH,EIF2B4,EIF2C2,EIF2S3,EIF4A2,EIF5A2,ELAC1,ELF1,ELMO1,ELP3,EMILIN1,EMP2,ENC1,ENPP2,ENSA,ENTPD1,EPB41L4B,EPC2,EPHA7,ERO1L,ETV1,ETV5,MECOM,EXOSC8,EXT1,EXTL2,F2R,F2RL2,F5,FAAH,FABP4,FABP5,FAM35A,FBXL4,FBXO18,FBXO25,FBXO32,FCER1G,FCGR2A,FCGR2B,FCGR3A,FDFT1,FECH,FETUB,FGF12,FGFR1,FGFR2,FGL1,FGL2,FILIP1,FKBP14,FKBP1B,FKBP9,FMO1,FMO5,FXR1,FYB,FYN,FZD3,FZD6,GABRA1,GABRG2,GARS,GAS7,GATA4,GC,GCH1,GDAP1,GDI2,GEM,GLCCI1,GLI3,GLUD1,GNAS,GNB4,GNPAT,GNRH1,GOLGB1,GORASP1,GPNMB,GPR161,GPR19,GPR88,GPRC5B,GREB1,GRIK2,GRSF1,GSR,GTF2E2,GTF2F2,GTF2H2,GTF3C2,GYG1,HACE1,HADHA,HADHB,HCLS1,HDAC9,HELLS,HEXB,HFE2,HIPK2,HIVEP1,HMGB1,HMGN3,HOXA1,HOXA13,HOXA2,HOXA4,HRG,HSD17B7,HSF2,HSPH1,HTR2A,HTR3A,ICA1,IFIT1,IF |

---

IT2,IFIT5,IGJ,IGSF11,IL15RA,IL1RAP,IL6,IL7R,IMAA,IMPA1,IMPG1,I  
NHBA,INMT,IQCB1,ITGA10,ITGB1BP1,ITGB5,ITSN2,JARID2,AIMP2,J  
UB,KBTBD2,KBTBD6,KCNH2,KCNJ10,KCNK3,KCNMB3,KCNQ3,KC  
NS2,KCNV1,KCTD4,KDEL2,KHDRBS3,KIAA0087,KIAA0196,KIAA0  
226,KIAA0564,FAM190B,KIAA1383,KIF13B,KIF5C,KIFAP3,KL,KLF12,  
KLHL11,KNG1,KPNA3,KRT6A,LAMA4,LARGE,LCPI,LCP2,LGALS3,L  
HFP,LIFR,LIG3,LIMK2,LIPA,LIPG,LIPH,LITAF,LMAN1,LMO7,LOC151  
658,LOC285972,LOC90520,LPIN1,LRCH1,LRCH3,LRP6,LRRC15,LRRF  
IP2,LSM1,LSM11,LUC7L2,LY6E,MAGEF1,MAN1B1,MANEA,MAP1B,  
MAP3K7,MAPK4,MAPKAP1,MATN2,MBD2,MCL1,MCM5,MDN1,ME1,  
MEOX2,MET,MFN1,C7orf70,MKLN1,MLH1,MLLT4,MMP14,MMP16,M  
MP9,MPP6,MRPL48,MRPS21,MRPS24,MRPS31,MRPS33,MSC,MTIF3,  
MTSS1,MTUS1,MYC,MYCN,MYH1,MYH9,MYO5B,MYO6,MYST3,NC  
AM1,NCBP2,NCOA1,NCOA2,NDE1,NDEL1,NDFIP2,NDUFB2,NDUFB5  
,NEDD4L,NEFL,NET1,NFAT5,NFATC3,NFE2L3,NFIA,NIT1,NOL7,NPC  
1L1,NQO1,NR1I3,NRG1,NT5C3,NT5E,NTAN1,NUBP1,NUDT15,NUP15  
5,NUPL2,OCLN,ODC1,OGDH,OLFM1,OPA1,ORC3L,ORC4L,OSBPL3,O  
SR1,LPAR6,PABPN1,PAK2,PANK1,PANK3,PARD6A,PBX3,PCCB,PCDH  
21,PCDH9,PCK1,PDAP1,PDE7A,PDE8B,PDGFRL,PDK3,PEX11B,PEX1  
2,PFDN4,PFN2,PGCP,PGM3,PHC3,PHF10,PIAS2,PIGM,PIGN,PIK3CA,P  
IK3R1,PILRA,PILRB,PKIA,PKIB,PLCE1,PLK1,PLOD2,PLSCR1,PMAIP  
1,PMP2,PNOC,POLK,POLR2J,POLR2J2,POLR2K,POLR3C,POLR3E,PO  
P1,POPDC3,POU4F1,PPIL6,PPM1G,PDP1,PPP2R2A,PPP2R3A,PRDX4,P  
RCAA1,PRKAB2,PRKCQ,PRLR,PRMT6,PROSC,PRRG1,PRSS2,PSMA7,  
PSMC6,PSME3,PTCD2,PTDSS1,PTK2,PTP4A3,PTPN12,PTTG1,PVT1,P  
XMP3,RAB22A,RAB25,RAB27B,RABIF,RAC1,RAE1,RAI14,RANBP10,  
RAPGEF5,RBM17,RBM23,RBM27,RBM8A,RBM9,RBP1,RBP4,RBPMS,  
RCBTB1,RDH10,RFC3,RFC4,RGNEF,RGS4,RGS5,RHOBTB1,RIMS2,R  
NASET2,RNF11,RNF13,ROCK2,RP9,RPA3,RPL17,RPL21,RPL30,RPS15  
A,RPS6KA2,RRAGD,RRM2,RRM2B,RRN3,RRS1,RTTN,RYK,SCARA3,  
SCD,SCEL,SCRN1,SDC2,SDHC,SDHD,SEC63,SELE,SELL,SELT,SENP2  
,SENP5,SENP6,SERP1,SERPINB3,SERPINI1,SETDB2,SFMBT2,SFRS12,  
SGCD,SH3BGR2,SH3RF2,SH3RF2,SIAH2,SIRT5,SKIL,SKP2,SLA,SLAMF8,SL  
C12A4,SLC13A3,SLC16A10,SLC30A3,SLC30A8,SLC37A3,SLC41A3,SL  
C4A4,SLC5A6,SLC7A2,SLC7A7,SLC9A9,SLCO2A1,SLIT1,SLITRK3,SL  
ITRK6,SLU7,SMA5,SMAD2,SMAD4,SMG1,SMURF1,SNAP91,SNX13,S  
NX4,SOCS1,SOCS6,SORBS1,SOX30,SPAG11B,SPATA13,SPATA6,SPG20  
,SPTA1,SR140,SRPRB,SSBP1,SST,STK10,STK17A,SULT1E1,SUPT16H,  
SURF1,SYNCRIP,TAZ,TBC1D7,TBP,TBRG4,TCEB1,TCERG1,TCF4,TC  
TE3,TERF1,TFDP2,TFRC,THAP11,THBS2,THPO,TIMP3,TM4SF4,TNFR  
SF11B,TNFSF10,TNIK,TNKS2,TNPO1,TOP2A,TOX,TP53I3,TPD52,TRA  
2A,TRGV9,TRIB2,TRIM35,TRIM4,TRIM5,TRIM6,TRIP6,TRPS1,TRPV6  
,TSGA14,TSPYL1,TTC14,TUBB1,TUBE1,TUBG1,TUBG2,TXNL1,UAP1  
,UBE2J1,UCP2,UGT2B15,UGT2B4,UQCRB,UQCRC2,USP12,USP13,UF

---

---

|                 |                                                                                                                                                                                                                                                                                                                                                                                                                                                                                                                                                                                                                                                                                                                                                                                                                                                                                                                                                                                                                                                                                                                                                                                                                                                                                                                                                                                                                                                                                                                                                                                                                                                                                                                                                                                                                                                                                                                                                                                                                                                                                                                                                      |
|-----------------|------------------------------------------------------------------------------------------------------------------------------------------------------------------------------------------------------------------------------------------------------------------------------------------------------------------------------------------------------------------------------------------------------------------------------------------------------------------------------------------------------------------------------------------------------------------------------------------------------------------------------------------------------------------------------------------------------------------------------------------------------------------------------------------------------------------------------------------------------------------------------------------------------------------------------------------------------------------------------------------------------------------------------------------------------------------------------------------------------------------------------------------------------------------------------------------------------------------------------------------------------------------------------------------------------------------------------------------------------------------------------------------------------------------------------------------------------------------------------------------------------------------------------------------------------------------------------------------------------------------------------------------------------------------------------------------------------------------------------------------------------------------------------------------------------------------------------------------------------------------------------------------------------------------------------------------------------------------------------------------------------------------------------------------------------------------------------------------------------------------------------------------------------|
|                 | M1, VAPB, VPS41, WASF1, WDR7, WFDC2, WISP1, WRN, WWP1, XK, YKT6, YWHAB, YWHAQ, ZBTB10, ZBTB24, ZCCHC2, ZDHHC19, ZDHHC21, ZDHHC4, ZFP90, ZFX, ZHX1, ZNF292, ZNF510, ZNF517, ZNF532, ZNRF2, ZRANB1, EIF2A                                                                                                                                                                                                                                                                                                                                                                                                                                                                                                                                                                                                                                                                                                                                                                                                                                                                                                                                                                                                                                                                                                                                                                                                                                                                                                                                                                                                                                                                                                                                                                                                                                                                                                                                                                                                                                                                                                                                              |
| Gene Prospector | BRCA2, BRCA1, AR, VDR, SRD5A2, GSTM1, RNASEL, GSTP1, GSTT1, MSR1, CYP17A1, KLK3, ELAC2, TNF, IGF1, CYP3A4, ESR2, HNF1B, ESR1, CYP1A1, MSMB, CDH1, TCF2, KLK2, OGG1, ERG, MTHFR, HPC3, CYP19A1, CFH, ARMS2, ETV1, C2, NOS3, PTGS2, VEGFA, KLF6, CHEK2, TP53, HIF1A, HSD17B1, MMP9, VEGF, CTBP2, JAZF1, LMTK2, MMP2, DAB2IP, CYP1B1, EGF, EHBP1, ASMD, SOD2, CDH13, NUDT10, ERBB4, TNRC6B, GSPT2, IL16, LTA, NOS2, NOS2A, NUDT11, HIF1AN, CPNE3, MAGED1, XRCC1, COMT, NATA2, IL10, IGFBP3, IL6, CYP3A5, ATM, TGFB1, PTEN, RNASE1, UGT2B17, CDKN1A, CDKN1B, CYP1A2, CYP2E1, CYP11A1, AMACR, HSD3B1, HSD3B2, IL1B, UGT2B15, AKR1C3, NAT1, TLR6, NQO1, EPHX1, FGFR4, IL8, MDM2, SHBG, SULT1A1, TLR1, TLR4, TLR10, NBN, TCF7L2, CRP, CYP2D6, CYP27B1, ACE, GPX1, GSTA1, GSTM3, HLA-A, IGFBP1, IL1RN, INS, LEP, LHB, MLH1, MTR, SERPINE1, PON1, PPARG, CCND1, BCL2, CYP3A43, ARL11, CCER5, CRY2, CSNK1E, CYP24A1, EPHB2, ERBB2, ERCC1, ERCC2, ERCC4, GNAS, MSH6, APC, HPN, HSD17B4, ID3, IGF2, IL1A, IL4, IRS1, LEPR, MC1R, MMP1, MPO, MSH2, MTRR, NKX3-1, NPAS2, PER1, PGR, ABCB1, CCL5, CXCL12, SLC22A3, SOD1, SULT1A2, TGFBR1, THBS1, TMPRSS2, TYR, XRCC3, COL18A1, NCOA3, CAT, CBS, TNFRSF10A, PER3, ADIPOQ, GDF15, CYP2C19, APOE, CDKN2A, DLC1, NCOA2, SH2B2, CFTR, ALDH1L1, LZTS1, TIRAP, SERPINA3, CCR2, PARP1, CX3CR1, CYP2C8, CYP2C9, CYP11B2, CYP27A1, DHFR, DNMT3B, EGFR, AHR, EMP3, EPHX2, ERCC5, ERCC6, EZH2, FHIT, SEC14L2, XRCC6, TES, GC, GCNT2, GHR, GNMT, GNRH1, SLCO1B3, NR3C1, GSTA2, HFE, HLA-B, HLA-C, HLA-DRB1, APEX1, HSD17B3, HSD17B2, HSPA1L, ICAM1, IGF1R, IL2, IL2RB, IL8RA, IL8RB, IL18, IRAK1, ITGA2, ITGB3, LIG4, LPL, LRP2, ARNT, SMAD3, MGMT, MIF, MMP7, MSH3, MTHFD1, ND3, MUC1, MYC, MYH11, ATBF1, ZFH3, TNFRSF11B, PAH, IRAK4, CPA4, PGK1, SERPINB10, PLAU, PODXL, UGT1A9, PPARA, UGT1A4, MED1, EPDR1, PRKDC, PRL, KLK10, PSAP, AHRR, BARD1, RAD51, RAD52, ABCE1, RXRA, RXRB, VPS52, BGLAP, CCL2, SEPP1, SHMT1, SOD3, COX1, AURKA, SULT2A1, TCF20, TH, THRA, ICAM5, TLR5, TTPA, TYMS, XPC, VKORC1, BRIP1, CASP8, BCAS1, CAV1, CAV2, NCOA1, IRS2, AIP, SART1, ABCG2, GSTO1, HPCX, CAPN10, AGT, PTPN22, GNB3, RET, CYP7B1 |

---

Table 3 The prioritization result of ranked prostate cancer candidate genes

| <i>Rank</i> | <i>Gene symbol</i> | <i>Entrez Gene ID</i> | <i>Rank</i> | <i>Gene symbol</i> | <i>Entrez Gene ID</i> |
|-------------|--------------------|-----------------------|-------------|--------------------|-----------------------|
| 1           | YWHAB              | 7529                  | 420         | RHOBTB1            | 9886                  |
| 2           | SMAD2              | 4087                  | 421         | CAV2               | 858                   |
| 3           | MYC                | 4609                  | 422         | CREBL2             | 1389                  |
| 4           | HLA-B              | 3106                  | 423         | ATP7B              | 540                   |
| 5           | TGFBR1             | 7046                  | 424         | GSTO1              | 9446                  |
| 6           | SMAD4              | 4089                  | 425         | TLR1               | 7096                  |
| 7           | ACTA2              | 59                    | 426         | GORASP1            | 64689                 |
| 8           | PLSCR1             | 5359                  | 427         | GSTM3              | 2947                  |
| 9           | COPB2              | 9276                  | 428         | FCER1G             | 2207                  |
| 10          | CBS                | 875                   | 429         | IRAK4              | 51135                 |
| 11          | EIF2S3             | 1968                  | 430         | LTA                | 4049                  |
| 12          | TBP                | 6908                  | 431         | CCR2               | 729230                |
| 13          | CDC2               | 983                   | 432         | IL8                | 3576                  |
| 14          | SMAD3              | 4088                  | 433         | CP                 | 1356                  |
| 15          | CFTR               | 1080                  | 434         | LEP                | 3952                  |
| 16          | NR3C1              | 2908                  | 435         | CCNG1              | 900                   |
| 17          | ERBB2              | 2064                  | 436         | ELF1               | 1997                  |
| 18          | SKIL               | 6498                  | 437         | NTAN1              | 123803                |
| 19          | PSMA7              | 5688                  | 438         | IL2                | 3558                  |
| 20          | OGDH               | 4967                  | 439         | TYMS               | 7298                  |
| 21          | YWHAQ              | 10971                 | 440         | CTCF               | 10664                 |
| 22          | RRM2               | 6241                  | 441         | DOK5               | 55816                 |
| 23          | PSMC6              | 5706                  | 442         | RPA3               | 6119                  |
| 24          | CHEK2              | 11200                 | 443         | IL1A               | 3552                  |
| 25          | CSNK1E             | 1454                  | 444         | PABPN1             | 8106                  |
| 26          | SOD1               | 6647                  | 445         | PIGM               | 93183                 |
| 27          | SMURF1             | 57154                 | 446         | UQCRC2             | 7385                  |
| 28          | PTP4A3             | 11156                 | 447         | ENSA               | 2029                  |
| 29          | IRS1               | 3667                  | 448         | KRT6A              | 3853                  |
| 30          | GCH1               | 2643                  | 449         | SNAP91             | 9892                  |
| 31          | XRCC6              | 2547                  | 450         | FABP4              | 2167                  |
| 32          | TNIK               | 23043                 | 451         | ICA1               | 3382                  |
| 33          | SUPT16H            | 11198                 | 452         | UQCRB              | 7381                  |
| 34          | ME1                | 4199                  | 453         | PTTG1              | 9232                  |
| 35          | NEDD4L             | 23327                 | 454         | ELMO1              | 9844                  |
| 36          | RBPMS              | 11030                 | 455         | CYB5A              | 1528                  |
| 37          | DDX56              | 54606                 | 456         | APOD               | 347                   |
| 38          | CAV1               | 857                   | 457         | OPA1               | 4976                  |
| 39          | RAD51              | 5888                  | 458         | RAI14              | 26064                 |

|    |          |        |     |           |        |
|----|----------|--------|-----|-----------|--------|
| 40 | RPL30    | 6156   | 459 | CD1D      | 912    |
| 41 | BCL2     | 596    | 460 | NDE1      | 54820  |
| 42 | PTK2     | 5747   | 461 | PMAIP1    | 5366   |
| 43 | CASP8    | 841    | 462 | SH3RF2    | 153769 |
| 44 | DLG1     | 1739   | 463 | EIF2C2    | 27161  |
| 45 | RXRA     | 6256   | 464 | HRG       | 3273   |
| 46 | DMD      | 1756   | 465 | TIMP3     | 7078   |
| 47 | MTHFD1   | 4522   | 466 | C6orf165  | 154313 |
| 48 | MYO5B    | 4645   | 467 | CCL13     | 6357   |
| 49 | MDM2     | 4193   | 468 | AKAP11    | 11215  |
| 50 | NCOA1    | 8648   | 469 | RPS6KA2   | 6196   |
| 51 | MAP3K7   | 6885   | 470 | GABRG2    | 2566   |
| 52 | CDKN1A   | 1026   | 471 | UAP1      | 6675   |
| 53 | ABCE1    | 6059   | 472 | SGCD      | 6444   |
| 54 | TOP2A    | 7153   | 473 | DCK       | 1633   |
| 55 | MCM5     | 4174   | 474 | HSF2      | 3298   |
| 56 | RPS15A   | 6210   | 475 | DOCK2     | 1794   |
| 57 | GARS     | 2617   | 476 | NOS2      | 4843   |
| 58 | ABCF3    | 55324  | 477 | PPP2R2A   | 5520   |
| 59 | TRIP6    | 7205   | 478 | EDNRB     | 1910   |
| 60 | TUBB1    | 81027  | 479 | LIMK2     | 3985   |
| 61 | ERCC2    | 2068   | 480 | TNFRSF11B | 4982   |
| 62 | RNF11    | 26994  | 481 | NRG1      | 3084   |
| 63 | COPG2    | 26958  | 482 | BAG4      | 9530   |
| 64 | PGK1     | 5230   | 483 | CHN2      | 1124   |
| 65 | SHBG     | 6462   | 484 | MYH1      | 4619   |
| 66 | ADHFE1   | 137872 | 485 | DPYSL5    | 56896  |
| 67 | BARD1    | 580    | 486 | POP1      | 10940  |
| 68 | PAK2     | 5062   | 487 | EXT1      | 2131   |
| 69 | LSM1     | 27257  | 488 | FAM190B   | 54462  |
| 70 | PRKDC    | 5591   | 489 | CXCL12    | 6387   |
| 71 | PLK1     | 5347   | 490 | EPHA7     | 2045   |
| 72 | MSH2     | 4436   | 491 | PEX12     | 5193   |
| 73 | TNPO1    | 3842   | 492 | IL18      | 3606   |
| 74 | ATR      | 545    | 493 | COL18A1   | 80781  |
| 75 | HMGB1    | 3146   | 494 | MSC       | 9242   |
| 76 | NCOA3    | 8202   | 495 | ERG       | 2078   |
| 77 | CDH1     | 999    | 496 | CASR      | 846    |
| 78 | AURKA    | 6790   | 497 | RYK       | 6259   |
| 79 | NCOA2    | 10499  | 498 | ATF6      | 22926  |
| 80 | ATP6V1C1 | 528    | 499 | MYST3     | 7994   |
| 81 | IRAK1    | 3654   | 500 | PDK3      | 5165   |
| 82 | CCND1    | 595    | 501 | EPDR1     | 54749  |
| 83 | HIF1A    | 3091   | 502 | EMILIN1   | 11117  |

|     |         |        |     |          |       |
|-----|---------|--------|-----|----------|-------|
| 84  | IGF1R   | 3480   | 503 | LITAF    | 9516  |
| 85  | BTAF1   | 9044   | 504 | SENP2    | 59343 |
| 86  | MAGED1  | 9500   | 505 | GABRA1   | 2554  |
| 87  | RRS1    | 23212  | 506 | IL15RA   | 3601  |
| 88  | CTBP2   | 1488   | 507 | CASP8AP2 | 9994  |
| 89  | PARP1   | 142    | 508 | ABCC2    | 1244  |
| 90  | BRF2    | 55290  | 509 | SOX30    | 11063 |
| 91  | LUC7L2  | 51631  | 510 | CSTF1    | 1477  |
| 92  | CDKN1B  | 1027   | 511 | ANXA13   | 312   |
| 93  | SFRS12  | 140890 | 512 | ERO1L    | 30001 |
| 94  | ZHX1    | 11244  | 513 | LMO7     | 4008  |
| 95  | PFN2    | 5217   | 514 | NQO1     | 1728  |
| 96  | MSH3    | 4437   | 515 | ITGB1BP1 | 9270  |
| 97  | ESR2    | 2100   | 516 | LCP1     | 3936  |
| 98  | LRP2    | 4036   | 517 | CYP11A1  | 1583  |
| 99  | CDK7    | 1022   | 518 | C7orf36  | 57002 |
| 100 | RFC4    | 5984   | 519 | KIAA0226 | 9711  |
| 101 | HSPA1L  | 3305   | 520 | DUSP12   | 11266 |
| 102 | SOD2    | 6648   | 521 | PHF10    | 55274 |
| 103 | VDR     | 7421   | 522 | CROT     | 54677 |
| 104 | TCERG1  | 10915  | 523 | RRAGD    | 58528 |
| 105 | GOLGB1  | 2804   | 524 | INMT     | 11185 |
| 106 | GDI2    | 2665   | 525 | CXCL1    | 2919  |
| 107 | RAC1    | 5879   | 526 | PRSS2    | 5645  |
| 108 | SHMT1   | 6470   | 527 | HNF1B    | 6928  |
| 109 | CDKN2A  | 1029   | 528 | IFIT1    | 3434  |
| 110 | MET     | 4233   | 529 | PKIA     | 5569  |
| 111 | HSD17B7 | 51478  | 530 | HOXA13   | 3209  |
| 112 | ITGB3   | 3690   | 531 | COBRA1   | 25920 |
| 113 | ATM     | 472    | 532 | TAZ      | 6901  |
| 114 | FGFR1   | 2260   | 533 | CRY2     | 1408  |
| 115 | CDC14A  | 8556   | 534 | AMY1A    | 276   |
| 116 | EIF2B4  | 8890   | 535 | TCF20    | 6942  |
| 117 | ERBB4   | 2066   | 536 | GEM      | 2669  |
| 118 | SOCS1   | 8651   | 537 | IL4      | 3565  |
| 119 | RPL17   | 6139   | 538 | PIGN     | 23556 |
| 120 | POLR2J  | 5439   | 539 | TRIM35   | 23087 |
| 121 | PSME3   | 10197  | 540 | PDAP1    | 11333 |
| 122 | IRS2    | 8660   | 541 | ICAM5    | 7087  |
| 123 | CCNC    | 892    | 542 | CNR1     | 1268  |
| 124 | PTPN12  | 5782   | 543 | ABCB1    | 5243  |
| 125 | HLA-C   | 3107   | 544 | CA8      | 767   |
| 126 | POLR2K  | 5440   | 545 | EDN3     | 1908  |
| 127 | MED1    | 5469   | 546 | COX1     | 4512  |

|     |         |       |     |          |       |
|-----|---------|-------|-----|----------|-------|
| 128 | MLLT4   | 4301  | 547 | FAAH     | 2166  |
| 129 | PPARG   | 5468  | 548 | SERPINB3 | 6317  |
| 130 | CCR5    | 1234  | 549 | NDFIP2   | 54602 |
| 131 | MYH9    | 4627  | 550 | PTGS2    | 5743  |
| 132 | APC     | 324   | 551 | GNPAT    | 8443  |
| 133 | WWP1    | 11059 | 552 | COMT     | 1312  |
| 134 | TUBG1   | 7283  | 553 | KCNJ10   | 3766  |
| 135 | FECH    | 2235  | 554 | MTSS1    | 9788  |
| 136 | RET     | 5979  | 555 | SDHC     | 6391  |
| 137 | THRA    | 7067  | 556 | SART1    | 9092  |
| 138 | THBS1   | 7057  | 557 | DDR2     | 4921  |
| 139 | KHDRBS3 | 10656 | 558 | PPM1G    | 5496  |
| 140 | MSH6    | 2956  | 559 | SR140    | 23350 |
| 141 | PPARA   | 5465  | 560 | VAPB     | 9217  |
| 142 | ORC4L   | 5000  | 561 | FBXO18   | 84893 |
| 143 | HIPK2   | 28996 | 562 | RAPGEF5  | 9771  |
| 144 | RFC3    | 5983  | 563 | RAB22A   | 57403 |
| 145 | TCEB1   | 6921  | 564 | TPD52    | 7163  |
| 146 | APEX1   | 328   | 565 | AKR1C3   | 8644  |
| 147 | MLH1    | 4292  | 566 | MDN1     | 23195 |
| 148 | TGFB1   | 7040  | 567 | ZRANB1   | 54764 |
| 149 | SRPRB   | 58477 | 568 | TBRG4    | 9238  |
| 150 | LCP2    | 3937  | 569 | B4GALT3  | 8703  |
| 151 | PGR     | 5241  | 570 | CTSK     | 1513  |
| 152 | PTEN    | 5728  | 571 | BGLAP    | 632   |
| 153 | GHR     | 2690  | 572 | SST      | 6750  |
| 154 | SKP2    | 6502  | 573 | IGFBP1   | 3484  |
| 155 | LIPA    | 3988  | 574 | CALB1    | 793   |
| 156 | EPHB2   | 2048  | 575 | HLA-DRB1 | 3123  |
| 157 | MMP2    | 4313  | 576 | XK       | 7504  |
| 158 | GLUD1   | 2746  | 577 | KCNQ3    | 3786  |
| 159 | GNB4    | 59345 | 578 | NKX3-1   | 4824  |
| 160 | MMP9    | 4318  | 579 | FZD3     | 7976  |
| 161 | BRAF    | 673   | 580 | COMMD2   | 51122 |
| 162 | MIF     | 4282  | 581 | EPC2     | 26122 |
| 163 | MAP1B   | 4131  | 582 | SLC30A3  | 7781  |
| 164 | NDEL1   | 81565 | 583 | NFATC3   | 4775  |
| 165 | ARNT    | 405   | 584 | CABLES2  | 81928 |
| 166 | IGFBP3  | 3486  | 585 | FHIT     | 2272  |
| 167 | SCD     | 6319  | 586 | ALG3     | 10195 |
| 168 | ARF1    | 375   | 587 | ABCG2    | 9429  |
| 169 | NCBP2   | 22916 | 588 | TXNL1    | 9352  |
| 170 | PARD6A  | 50855 | 589 | GTF3C2   | 2976  |
| 171 | WRN     | 7486  | 590 | CLDN11   | 5010  |



|     |          |       |     |          |       |
|-----|----------|-------|-----|----------|-------|
| 172 | PRKCQ    | 5588  | 591 | SLU7     | 10569 |
| 173 | TERF1    | 7013  | 592 | RGS5     | 8490  |
| 174 | EXOSC8   | 11340 | 593 | HELLS    | 3070  |
| 175 | IL2RB    | 3560  | 594 | PRDX4    | 10549 |
| 176 | DTNB     | 1838  | 595 | PDP1     | 54704 |
| 177 | MPP6     | 51678 | 596 | SPG20    | 23111 |
| 178 | KNG1     | 3827  | 597 | UCP2     | 7351  |
| 179 | IL16     | 3603  | 598 | OSBPL3   | 26031 |
| 180 | ITGB5    | 3693  | 599 | YKT6     | 10652 |
| 181 | AHR      | 196   | 600 | RP9      | 6100  |
| 182 | DAB2     | 1601  | 601 | JUB      | 84962 |
| 183 | MCL1     | 4170  | 602 | CDR2     | 1039  |
| 184 | BRCA2    | 675   | 603 | C20orf11 | 54994 |
| 185 | SDC2     | 6383  | 604 | LHB      | 3972  |
| 186 | DLEU1    | 10301 | 605 | POLR3E   | 55718 |
| 187 | GAS7     | 8522  | 606 | SSBP1    | 6742  |
| 188 | AMPH     | 273   | 607 | CD86     | 942   |
| 189 | PIK3CA   | 5290  | 608 | GSTT1    | 2952  |
| 190 | RXRB     | 6257  | 609 | CPA4     | 51200 |
| 191 | GNAS     | 2778  | 610 | SDHD     | 6392  |
| 192 | ATP5J2   | 9551  | 611 | GNB3     | 2784  |
| 193 | COG3     | 83548 | 612 | DPT      | 1805  |
| 194 | WASF1    | 8936  | 613 | TRA2A    | 29896 |
| 195 | CBX3     | 11335 | 614 | RAB27B   | 5874  |
| 196 | GTF2F2   | 2963  | 615 | C2       | 717   |
| 197 | SH2B2    | 10603 | 616 | CCR6     | 1235  |
| 198 | PIAS2    | 9063  | 617 | NFE2L3   | 9603  |
| 199 | MUC1     | 4582  | 618 | BAALC    | 79870 |
| 200 | HLA-A    | 3105  | 619 | ZBTB24   | 9841  |
| 201 | IL8RB    | 3579  | 620 | NFIA     | 4774  |
| 202 | TLR4     | 7099  | 621 | BRIP1    | 83990 |
| 203 | OCLN     | 4950  | 622 | ERCC1    | 2067  |
| 204 | NBN      | 4683  | 623 | JARID2   | 3720  |
| 205 | AIMP2    | 7965  | 624 | HMG3     | 9324  |
| 206 | ELAC2    | 60528 | 625 | ERCC4    | 2072  |
| 207 | ID3      | 3399  | 626 | ANKRD1   | 27063 |
| 208 | ATP6V0A1 | 535   | 627 | RNASEL   | 6041  |
| 209 | COG6     | 57511 | 628 | RBM17    | 84991 |
| 210 | ACLY     | 47    | 629 | POU4F1   | 5457  |
| 211 | FDFT1    | 2222  | 630 | RRM2B    | 50484 |
| 212 | PXMP3    | 5828  | 631 | ANKRA2   | 57763 |
| 213 | DRG1     | 4733  | 632 | PILRA    | 29992 |
| 214 | GTF2E2   | 2961  | 633 | AMD1     | 262   |
| 215 | CASP2    | 835   | 634 | PLCE1    | 51196 |

|     |          |       |     |           |        |
|-----|----------|-------|-----|-----------|--------|
| 216 | EIF2A    | 83939 | 635 | MAPK4     | 5596   |
| 217 | ARFGAP1  | 55738 | 636 | KIF13B    | 23303  |
| 218 | PRKAB2   | 5565  | 637 | ABHD1     | 84696  |
| 219 | RAE1     | 8480  | 638 | ATAD2     | 29028  |
| 220 | HSPH1    | 10808 | 639 | KIAA0087  | 9808   |
| 221 | FGFR2    | 2263  | 640 | CDH3      | 1001   |
| 222 | KIF5C    | 3800  | 641 | LZTS1     | 11178  |
| 223 | C2orf18  | 54978 | 642 | NIT1      | 4817   |
| 224 | GSR      | 2936  | 643 | PANK1     | 53354  |
| 225 | ATP2C1   | 27032 | 644 | TLR6      | 10333  |
| 226 | PRKAA1   | 5562  | 645 | CTSC      | 1075   |
| 227 | RRN3     | 54700 | 646 | COG2      | 22796  |
| 228 | HTR2A    | 3356  | 647 | UBE2J1    | 51465  |
| 229 | VPS52    | 6293  | 648 | ACE       | 1636   |
| 230 | PSAP     | 5660  | 649 | LSM11     | 134353 |
| 231 | GLI3     | 2737  | 650 | SLIT1     | 6585   |
| 232 | SULT1E1  | 6783  | 651 | PCCB      | 5096   |
| 233 | GATA4    | 2626  | 652 | BMPER     | 168667 |
| 234 | BMP7     | 655   | 653 | COG7      | 91949  |
| 235 | RIMS2    | 9699  | 654 | SEC14L2   | 23541  |
| 236 | MMP14    | 4323  | 655 | NDUFB5    | 4711   |
| 237 | ZFHX3    | 463   | 656 | MTR       | 4548   |
| 238 | FGFR4    | 2264  | 657 | MAN1B1    | 11253  |
| 239 | TLR5     | 7100  | 658 | NT5E      | 4907   |
| 240 | ORC3L    | 23595 | 659 | SLC12A4   | 6560   |
| 241 | ITSN2    | 50618 | 660 | C14orf119 | 55017  |
| 242 | PBX3     | 5090  | 661 | SELT      | 51714  |
| 243 | HSD17B4  | 3295  | 662 | OLFM1     | 10439  |
| 244 | MYO6     | 4646  | 663 | CPB2      | 1361   |
| 245 | SORBS1   | 10580 | 664 | MFN1      | 55669  |
| 246 | CDKN2C   | 1031  | 665 | PON1      | 5444   |
| 247 | FCGR2B   | 2213  | 666 | HFE       | 3077   |
| 248 | NEFL     | 4747  | 667 | SERPINI1  | 5274   |
| 249 | SERPINA3 | 12    | 668 | TRIM5     | 85363  |
| 250 | PFDN4    | 5203  | 669 | C6        | 729    |
| 251 | FXR1     | 8087  | 670 | WISP1     | 8840   |
| 252 | DNMT3B   | 1789  | 671 | RBP4      | 5950   |
| 253 | PRLR     | 5618  | 672 | THBS2     | 7058   |
| 254 | VPS41    | 27072 | 673 | MC1R      | 4157   |
| 255 | HCLS1    | 3059  | 674 | IL10      | 3586   |
| 256 | SNX4     | 8723  | 675 | FZD6      | 8323   |
| 257 | PAH      | 5053  | 676 | PRMT6     | 55170  |
| 258 | AGTR1    | 185   | 677 | C7orf16   | 10842  |
| 259 | SEC63    | 11231 | 678 | PODXL     | 5420   |

|     |           |        |     |          |        |
|-----|-----------|--------|-----|----------|--------|
| 260 | AGT       | 183    | 679 | ANGPT2   | 285    |
| 261 | CCL5      | 6352   | 680 | UFM1     | 51569  |
| 262 | TFRC      | 7037   | 681 | KLF12    | 11278  |
| 263 | SERPINE1  | 5054   | 682 | DNAH11   | 8701   |
| 264 | IGF2      | 3481   | 683 | C10orf18 | 54906  |
| 265 | MMP1      | 4312   | 684 | ZDHHC4   | 55146  |
| 266 | MEOX2     | 4223   | 685 | MAPKAP1  | 79109  |
| 267 | BMPR1A    | 657    | 686 | SENP6    | 26054  |
| 268 | EEF2K     | 29904  | 687 | PKIB     | 5570   |
| 269 | BECN1     | 8678   | 688 | EIF5A2   | 56648  |
| 270 | XRCC3     | 7517   | 689 | ANKRD6   | 22881  |
| 271 | LIG4      | 3981   | 690 | SLC41A3  | 54946  |
| 272 | CPNE4     | 131034 | 691 | NFAT5    | 10725  |
| 273 | DACH1     | 1602   | 692 | LRRFIP2  | 9209   |
| 274 | LEPR      | 3953   | 693 | ENC1     | 8507   |
| 275 | TNFRSF10A | 8797   | 694 | LMTK2    | 22853  |
| 276 | IL1RAP    | 3556   | 695 | GPNMB    | 10457  |
| 277 | FYB       | 2533   | 696 | FGF12    | 2257   |
| 278 | APOB      | 338    | 697 | HEXB     | 3074   |
| 279 | LAMA4     | 3910   | 698 | PRL      | 5617   |
| 280 | ITGA2     | 3673   | 699 | BCAS1    | 8537   |
| 281 | INS       | 3630   | 700 | TRIB2    | 28951  |
| 282 | APOE      | 348    | 701 | CSMD1    | 64478  |
| 283 | MMP7      | 4316   | 702 | FKBP9    | 11328  |
| 284 | PLAU      | 5328   | 703 | ZNF510   | 22869  |
| 285 | HOXA1     | 3198   | 704 | GDAP1    | 54332  |
| 286 | SELL      | 6402   | 705 | SNX13    | 23161  |
| 287 | EIF4A2    | 1974   | 706 | HTR3A    | 3359   |
| 288 | KLK3      | 354    | 707 | CDC2L5   | 8621   |
| 289 | FABP5     | 2171   | 708 | MRPS31   | 10240  |
| 290 | PROSC     | 11212  | 709 | DAB2IP   | 153090 |
| 291 | ERCC6     | 2074   | 710 | GPX1     | 2876   |
| 292 | NOS3      | 4846   | 711 | CYP19A1  | 1588   |
| 293 | MYH11     | 4629   | 712 | NUPL2    | 11097  |
| 294 | KIFAP3    | 22920  | 713 | CYP17A1  | 1586   |
| 295 | DHFR      | 1719   | 714 | ACAA2    | 10449  |
| 296 | F2R       | 2149   | 715 | FBXO25   | 26260  |
| 297 | TCF4      | 6925   | 716 | ATP1B3   | 483    |
| 298 | TIRAP     | 114609 | 717 | OSR1     | 130497 |
| 299 | CD47      | 961    | 718 | IL1RN    | 3557   |
| 300 | TNF       | 7124   | 719 | DEXI     | 28955  |
| 301 | RABIF     | 5877   | 720 | C10orf88 | 80007  |
| 302 | LPL       | 4023   | 721 | NUDT11   | 55190  |
| 303 | VEGFA     | 7422   | 722 | SH3BGRL2 | 83699  |

|     |          |       |     |          |        |
|-----|----------|-------|-----|----------|--------|
| 304 | NR1I3    | 9970  | 723 | EPHX2    | 2053   |
| 305 | XRCC1    | 7515  | 724 | IGJ      | 3512   |
| 306 | CCL7     | 6354  | 725 | DPP7     | 29952  |
| 307 | DNMT3A   | 1788  | 726 | SLC22A3  | 6581   |
| 308 | HDAC9    | 9734  | 727 | LY6E     | 4061   |
| 309 | CNOT4    | 4850  | 728 | ALDH1L1  | 10840  |
| 310 | GTF2H2   | 2966  | 729 | RNASE1   | 6035   |
| 311 | CA2      | 760   | 730 | PHC3     | 80012  |
| 312 | KPNA3    | 3839  | 731 | BLZF1    | 8548   |
| 313 | HADHA    | 3030  | 732 | CYP2D6   | 1565   |
| 314 | PGM3     | 5238  | 733 | DCTN6    | 10671  |
| 315 | TP53I3   | 9540  | 734 | GSTM1    | 2944   |
| 316 | SIAH2    | 6478  | 735 | WDR7     | 23335  |
| 317 | ACVR2B   | 93    | 736 | NET1     | 10276  |
| 318 | F2RL2    | 2151  | 737 | DBC1     | 1620   |
| 319 | NCAM1    | 4684  | 738 | MPO      | 4353   |
| 320 | USP13    | 8975  | 739 | HPN      | 3249   |
| 321 | TCF7L2   | 6934  | 740 | GNRH1    | 2796   |
| 322 | MBD2     | 8932  | 741 | MMP16    | 4325   |
| 323 | IGF1     | 3479  | 742 | ADIPOQ   | 9370   |
| 324 | IL7R     | 3575  | 743 | CRH      | 1392   |
| 325 | TFDP2    | 7029  | 744 | IFIT2    | 3433   |
| 326 | KLK2     | 3817  | 745 | HOXA2    | 3199   |
| 327 | TH       | 7054  | 746 | ABCB5    | 340273 |
| 328 | AP1S1    | 1174  | 747 | NAT2     | 10     |
| 329 | RAD52    | 5893  | 748 | ARL4A    | 10124  |
| 330 | ANK3     | 288   | 749 | TTPA     | 7274   |
| 331 | CYP1A2   | 1544  | 750 | TTC14    | 151613 |
| 332 | LRP6     | 4040  | 751 | ETV5     | 2119   |
| 333 | IL6      | 3569  | 752 | PCK1     | 5105   |
| 334 | SLA      | 6503  | 753 | PNOC     | 5368   |
| 335 | SOCS6    | 9306  | 754 | PCDH9    | 5101   |
| 336 | BNIP3L   | 665   | 755 | TRPS1    | 7227   |
| 337 | LGALS3   | 3958  | 756 | IQCB1    | 9657   |
| 338 | RAB25    | 57111 | 757 | ARL11    | 115761 |
| 339 | SMG1     | 23049 | 758 | JAZF1    | 221895 |
| 340 | INHBA    | 3624  | 759 | DGKI     | 9162   |
| 341 | CYP3A4   | 1576  | 760 | RNF13    | 11342  |
| 342 | MATN2    | 4147  | 761 | ARHGAP19 | 84986  |
| 343 | XPC      | 7508  | 762 | PLOD2    | 5352   |
| 344 | COX15    | 1355  | 763 | CAPN10   | 11132  |
| 345 | COL4A3BP | 10087 | 764 | KCTD4    | 386618 |
| 346 | RBM9     | 23543 | 765 | DLC1     | 10395  |
| 347 | PTPN22   | 26191 | 766 | ENTPD1   | 953    |

|     |         |       |     |         |        |
|-----|---------|-------|-----|---------|--------|
| 348 | ICAM1   | 3383  | 767 | CTDSPL  | 10217  |
| 349 | CPSF1   | 29894 | 768 | ITGA10  | 8515   |
| 350 | AIP     | 9049  | 769 | ELP3    | 55140  |
| 351 | RPL21   | 6144  | 770 | EHBP1   | 23301  |
| 352 | RBM8A   | 9939  | 771 | CYP2E1  | 1571   |
| 353 | HIF1AN  | 55662 | 772 | CYP2C8  | 1558   |
| 354 | HADHB   | 3032  | 773 | CYP2C9  | 1559   |
| 355 | SELE    | 6401  | 774 | ABCC6   | 368    |
| 356 | SYNCRIP | 10492 | 775 | MSR1    | 4481   |
| 357 | SPTA1   | 6708  | 776 | MKLN1   | 4289   |
| 358 | TNFSF10 | 8743  | 777 | RANBP10 | 57610  |
| 359 | TUBG2   | 27175 | 778 | C5orf4  | 10826  |
| 360 | BUB3    | 9184  | 779 | CYP1B1  | 1545   |
| 361 | ODC1    | 4953  | 780 | EZH2    | 2146   |
| 362 | FCGR3A  | 2214  | 781 | POLK    | 51426  |
| 363 | DNMBP   | 23268 | 782 | GLCCI1  | 113263 |
| 364 | CRP     | 1401  | 783 | FKBP1B  | 2281   |
| 365 | KLF6    | 1316  | 784 | COMMD5  | 28991  |
| 366 | BCL2L2  | 599   | 785 | THPO    | 7066   |
| 367 | NPAS2   | 4862  | 786 | LIPG    | 9388   |
| 368 | CGA     | 1081  | 787 | SCEL    | 8796   |
| 369 | MYCN    | 4613  | 788 | TNRC6B  | 23112  |
| 370 | IMPA1   | 3612  | 789 | FGL2    | 10875  |
| 371 | RGS4    | 5999  | 790 | PDE8B   | 8622   |
| 372 | GNMT    | 27232 | 791 | POLR3C  | 10623  |
| 373 | HIVEP1  | 3096  | 792 | FAM35A  | 54537  |
| 374 | LIFR    | 3977  | 793 | HSD3B2  | 3284   |
| 375 | CCNJ    | 54619 | 794 | TYR     | 7299   |
| 376 | CAT     | 847   | 795 | LRCH3   | 84859  |
| 377 | BTF3    | 689   | 796 | FBXL4   | 26235  |
| 378 | CNTNAP1 | 8506  | 797 | FBXO32  | 114907 |
| 379 | MTHFR   | 4524  | 798 | GRSF1   | 2926   |
| 380 | EGF     | 1950  | 799 | KDEL2   | 11014  |
| 381 | ROCK2   | 9475  | 800 | EHHADH  | 1962   |
| 382 | RBM23   | 55147 | 801 | CPNE3   | 8895   |
| 383 | FCGR2A  | 2212  | 802 | KLK10   | 5655   |
| 384 | TLR10   | 81793 | 803 | CYP1A1  | 1543   |
| 385 | IL8RA   | 3577  | 804 | SOD3    | 6649   |
| 386 | ACIN1   | 22985 | 805 | CYP4B1  | 1580   |
| 387 | F5      | 2153  | 806 | DPYS    | 1807   |
| 388 | APCS    | 325   | 807 | AGXT2   | 64902  |
| 389 | CCL2    | 6347  | 808 | NUDT10  | 170685 |
| 390 | E2F5    | 1875  | 809 | EMP3    | 2014   |
| 391 | MECOM   | 2122  | 810 | TNKS2   | 80351  |

|     |         |       |     |         |        |
|-----|---------|-------|-----|---------|--------|
| 392 | PER3    | 8863  | 811 | DFNA5   | 1687   |
| 393 | CLDN1   | 9076  | 812 | COX6C   | 1345   |
| 394 | ATAD1   | 84896 | 813 | WFDC2   | 10406  |
| 395 | PPP2R3A | 5523  | 814 | CYP24A1 | 1591   |
| 396 | LIG3    | 3980  | 815 | ALOX5AP | 241    |
| 397 | TRPV6   | 55503 | 816 | IFIT5   | 24138  |
| 398 | NUP155  | 9631  | 817 | MRPS33  | 51650  |
| 399 | RBP1    | 5947  | 818 | DPEP2   | 64174  |
| 400 | NUBP1   | 4682  | 819 | CD5L    | 922    |
| 401 | GYG1    | 2992  | 820 | SETDB2  | 83852  |
| 402 | AMOTL2  | 51421 | 821 | PEX11B  | 8799   |
| 403 | CD48    | 962   | 822 | TSPYL1  | 7259   |
| 404 | MGMT    | 4255  | 823 | ZNF292  | 23036  |
| 405 | TES     | 26136 | 824 | MRPS24  | 64951  |
| 406 | KCNH2   | 3757  | 825 | SLC7A7  | 9056   |
| 407 | CFH     | 3075  | 826 | PILRB   | 29990  |
| 408 | ETV1    | 2115  | 827 | TRIM6   | 117854 |
| 409 | GC      | 2638  | 828 | LARGE   | 9215   |
| 410 | OGG1    | 4968  | 829 | HACE1   | 57531  |
| 411 | PER1    | 5187  | 830 | CDH13   | 1012   |
| 412 | LMAN1   | 3998  | 831 | CDH19   | 28513  |
| 413 | ERCC5   | 2073  | 832 | CRHBP   | 1393   |
| 414 | CCNE2   | 9134  | 833 | CX3CR1  | 1524   |
| 415 | KCNK3   | 3777  | 834 | EBPL    | 84650  |
| 416 | GRIK2   | 2898  | 835 | AMACR   | 23600  |
| 417 | DDX1    | 1653  | 836 | GSTA2   | 2939   |
| 418 | GSTP1   | 2950  | 837 | GSTA1   | 2938   |
| 419 | IL1B    | 3553  | 838 | MTRR    | 4552   |

---

Table 4 Summary of GO Biological Process and KEGG pathways enrichment results of different ranked thresholds

Table 4-1-1 The GO Biological Process enrichment results of the top50 genes

| <i>Go term</i>                   | <i>Gene Counts</i> | <i>P-value*</i> | <i>BenjaminiFDR#</i> |
|----------------------------------|--------------------|-----------------|----------------------|
| regulation of cell proliferation | 19                 | 5.97E-12        | 3.37E-10             |
| programmed cell death            | 14                 | 1.82E-08        | 3.01E-07             |
| cell cycle                       | 12                 | 1.51E-05        | 1.19E-04             |
| cell communication               | 10                 | 5.92E-04        | 0.00318              |
| signal transduction              | 22                 | 1.57E-06        | 1.50E-05             |
| apoptosis                        | 14                 | 1.51E-08        | 2.54E-07             |
| protein modification process     | 15                 | 5.76E-05        | 3.93E-04             |
| cell activation                  | 13                 | 4.65E-11        | 1.85E-09             |

\* *P-values were obtained using the gene list included in PPI network as a background list based on fisher's exact test.* # *Benjamini–Hochberg–Yekutieli procedure controls the false discovery rate (FDR).*

Table 4-1-2 The enrichment results of KEGG pathways of the top 50 genes

| <i>Pathways</i>            | <i>Gene Symbol</i>                                                              | <i>P-value*</i> | <i>BenjaminiFDR#</i> |
|----------------------------|---------------------------------------------------------------------------------|-----------------|----------------------|
| p53 signaling pathway      | CCND1, FAS, CDKN1A, CASP3, TP53                                                 | 0.00182         | 0.00389              |
| Cell cycle                 | CCND1, EP300, CDKN1A, TP53, MYC                                                 | 0.0156          | 0.0274               |
| TGF-beta signaling pathway | IFNG, EP300, MAPK3, TNF, SP1, MYC, MAPK1                                        | 5.37E-05        | 1.86E-04             |
| Wnt signaling pathway      | JUN, CCND1, MAPK8, EP300, TP53, MYC                                             | 0.00660         | 0.0126               |
| Focal adhesion             | CCND1, JUN, SRC, HRAS, BCL2, MAPK8, EGFR, AKT1, VEGFA, GRB2, MAPK3, ACTB, MAPK1 | 2.07E-08        | 1.70E-07             |
| Adherens junction          | SRC, EGFR, EP300, MAPK3, ACTB, MAPK1                                            | 2.98E-04        | 8.14E-04             |

\* *P-values were obtained using the gene list included in PPI network as a background list based on fisher's exact test.* # *Benjamini–Hochberg–Yekutieli procedure controls the false discovery rate (FDR).*

Table 4-2-1 The GO Biological Process enrichment results of the top150 genes

| <i>Go term</i>                   | <i>Gene Counts</i> | <i>P-value*</i> | <i>BenjaminiFDR<sup>#</sup></i> |
|----------------------------------|--------------------|-----------------|---------------------------------|
| regulation of cell proliferation | 46                 | 1.97E-20        | 3.59E-18                        |
| programmed cell death            | 30                 | 4.91E-20        | 7.27E-18                        |
| cell cycle                       | 26                 | 1.02E-06        | 1.05E-05                        |
| cell communication               | 16                 | 0.0295          | 0.116                           |
| signal transduction              | 57                 | 7.75E-09        | 1.25E-07                        |
| apoptosis                        | 30                 | 1.14E-11        | 3.51E-10                        |
| protein modification process     | 42                 | 5.06E-09        | 8.63E-08                        |
| cell activation                  | 23                 | 1.01E-12        | 3.94E-11                        |

\* *P-values were obtained using the gene list included in PPI network as a background list based on fisher's exact test.* # *Benjamini–Hochberg–Yekutieli procedure controls the false discovery rate (FDR).*



Table 4-2-2 The enrichment results of KEGG pathways of the top150 genes

| <i>Pathways</i>            | <i>Gene Symbol</i>                                                                                                                                                       | <i>P-value*</i> | <i>BenjaminiFDR<sup>#</sup></i> |
|----------------------------|--------------------------------------------------------------------------------------------------------------------------------------------------------------------------|-----------------|---------------------------------|
| Prostate cancer            | HRAS, IKBKG, RAF1, EGFR, EP300, RELA, IGF1, CDKN1A, EGF, CTNNB1, CREBBP, AR, INS, CCND1, ERBB2, PTEN, BCL2, CDK2, RB1, CREB1, AKT1, TP53, GRB2, MAPK3, NFKBIA, MAPK1     | 8.59E-20        | 4.60E-18                        |
| p53 signaling pathway      | CCND1, CYCS, FAS, CHEK2, PTEN, CDK2, CDKN2A, IGF1, CDKN1A, CASP3, TP53, CDK1                                                                                             | 1.03E-06        | 4.09E-06                        |
| Cell cycle                 | CCND1, CHEK2, EP300, CDK2, CDKN2A, RB1, ABL1, CDKN1A, TP53, CDK1, SKP1, CREBBP, SMAD3, HDAC1, SMAD4, PCNA, MYC                                                           | 9.21E-08        | 4.69E-07                        |
| TGF-beta signaling pathway | IFNG, RHOA, CREBBP, EP300, SMAD3, MAPK3, TNF, SMAD4, SP1, MYC, SKP1, MAPK1                                                                                               | 1.49E-05        | 4.69E-05                        |
| Wnt signaling pathway      | CCND1, CSNK2A1, JUN, CSNK2A2, MAPK8, PRKCA, EP300, TP53, SKP1, CTNNB1, RHOA, CREBBP, SMAD3, SMAD4, RAC1, MYC                                                             | 8.84E-06        | 2.96E-05                        |
| Focal adhesion             | JUN, HRAS, MAPK8, RAF1, EGFR, PRKCA, IGF1, EGF, CTNNB1, VEGFA, RHOA, ACTB, CCND1, ERBB2, SRC, PTK2, PTEN, BCL2, AKT1, ITGB1, GRB2, MAPK3, FYN, ACTG1, RAC1, CDC42, MAPK1 | 4.89E-12        | 5.23E-11                        |
| Adherens junction          | CSNK2A1, SRC, ERBB2, CSNK2A2, EGFR, EP300, CTNNB1, RHOA, CREBBP, SMAD3, MAPK3, SMAD4, FYN, ACTG1, ACTB, RAC1, CDC42, CDH1, MAPK1                                         | 4.01E-13        | 5.37E-12                        |
| ErbB signaling pathway     | JUN, HRAS, PTK2, SRC, ERBB2, MAPK8, RAF1, PRKCA, EGFR, ABL1, EGF, CDKN1A, AKT1, PLCG1, GRB2, MAPK3, STAT5A, MYC, MAPK1                                                   | 6.18E-12        | 6.01E-11                        |

\* *P-values were obtained using the gene list included in PPI network as a background list based on fisher's exact test.* <sup>#</sup> *Benjamini-Hochberg-Yekutieli procedure controls the false discovery rate (FDR).*

Table 4-3-1 The GO Biological Process enrichment results of the top200 genes

| <i>Go term</i>                   | <i>Gene Counts</i> | <i>P-value*</i> | <i>BenjaminiFDR<sup>#</sup></i> |
|----------------------------------|--------------------|-----------------|---------------------------------|
| regulation of cell proliferation | 56                 | 4.88E-23        | 7.85E-21                        |
| programmed cell death            | 35                 | 8.30E-12        | 1.80E-10                        |
| cell cycle                       | 33                 | 5.76E-08        | 6.56E-07                        |
| cell communication               | 22                 | 0.00552         | 0.0272                          |
| signal transduction              | 75                 | 1.99E-11        | 4.05E-10                        |
| apoptosis                        | 34                 | 2.58E-11        | 5.11E-10                        |
| protein modification process     | 53                 | 1.74E-10        | 2.90E-09                        |
| cell activation                  | 31                 | 1.74E-17        | 9.92E-16                        |

\* *P-values were obtained using the gene list included in PPI network as a background list based on fisher's exact test.* # *Benjamini–Hochberg–Yekutieli procedure controls the false discovery rate (FDR).*

Table 4-3-2 The enrichment results of KEGG pathways of the top200 genes

| <i>Pathways</i>                   | <i>Gene Symbol</i>                                                                                                                                                       | <i>P-value*</i> | <i>BenjaminiFDR<sup>#</sup></i> |
|-----------------------------------|--------------------------------------------------------------------------------------------------------------------------------------------------------------------------|-----------------|---------------------------------|
| <i>Prostate cancer</i>            | HRAS, IKBKG, RAF1, EGFR, EP300, RELA, IGF1, CDKN1A, EGF, CTNNB1, CREBBP, AR, INS, CCND1, ERBB2, PTEN, BCL2, CDK2, RB1, CREB1, AKT1, TP53, GRB2, MAPK3, NFKBIA, MAPK1     | 6.55E-23        | 3.63E-21                        |
| <i>p53 signaling pathway</i>      | CCND1, CYCS, FAS, CHEK2, PTEN, CDK2, CDKN2A, IGF1, CDKN1A, CASP3, TP53, CDK1                                                                                             | 1.21E-05        | 3.71E-05                        |
| <i>Cell cycle</i>                 | CCND1, CHEK2, EP300, CDK2, CDKN2A, RB1, ABL1, CDKN1A, TP53, CDK1, SKP1, CREBBP, SMAD3, HDAC1, SMAD4, PCNA, MYC                                                           | 1.09E-07        | 4.66E-07                        |
| <i>TGF-beta signaling pathway</i> | IFNG, RHOA, CREBBP, EP300, SMAD3, MAPK3, TNF, SMAD4, SP1, MYC, SKP1, MAPK1                                                                                               | 5.88E-06        | 1.92E-05                        |
| <i>Wnt signaling pathway</i>      | CCND1, CSNK2A1, JUN, CSNK2A2, MAPK8, PRKCA, EP300, TP53, SKP1, CTNNB1, RHOA, CREBBP, SMAD3, SMAD4, RAC1, MYC                                                             | 1.20E-05        | 3.71E-05                        |
| <i>Focal adhesion</i>             | JUN, HRAS, MAPK8, RAF1, EGFR, PRKCA, IGF1, EGF, CTNNB1, VEGFA, RHOA, ACTB, CCND1, ERBB2, SRC, PTK2, PTEN, BCL2, AKT1, ITGB1, GRB2, MAPK3, FYN, ACTG1, RAC1, CDC42, MAPK1 | 1.10E-11        | 8.12E-11                        |
| <i>Adherens junction</i>          | CSNK2A1, SRC, ERBB2, CSNK2A2, EGFR, EP300, CTNNB1, RHOA, CREBBP, SMAD3, MAPK3, SMAD4, FYN, ACTG1, ACTB, RAC1, CDC42, CDH1, MAPK1                                         | 3.07E-12        | 2.62E-11                        |
| <i>ErbB signaling pathway</i>     | JUN, HRAS, PTK2, SRC, ERBB2, MAPK8, RAF1, PRKCA, EGFR, ABL1, EGF, CDKN1A, AKT1, PLCG1, GRB2, MAPK3, STAT5A, MYC, MAPK1                                                   | 5.66E-13        | 5.71E-12                        |

\* *P-values were obtained using the gene list included in PPI network as a background list based on fisher's exact test.* <sup>#</sup> *Benjamini-Hochberg-Yekutieli procedure controls the false discovery rate (FDR).*

Table 4-4-1 The GO Biological Process enrichment results of the top300 genes

| <i>Go term</i>                   | <i>Gene Counts</i> | <i>P-value*</i> | <i>BenjaminiFDR<sup>#</sup></i> |
|----------------------------------|--------------------|-----------------|---------------------------------|
| regulation of cell proliferation | 80                 | 1.85E-30        | 5.82E-28                        |
| programmed cell death            | 49                 | 1.10E-14        | 3.42E-13                        |
| cell cycle                       | 45                 | 6.79E-09        | 8.82E-08                        |
| cell communication               | 37                 | 3.63E-05        | 2.64E-04                        |
| signal transduction              | 94                 | 1.97E-08        | 2.40E-07                        |
| DNA repair                       | 12                 | 0.0434          | 0.172                           |
| apoptosis                        | 46                 | 4.83E-13        | 1.09E-11                        |
| protein modification process     | 70                 | 2.85E-10        | 4.25E-09                        |
| cell activation                  | 39                 | 6.66E-19        | 3.12E-17                        |
| cell growth                      | 5                  | 0.0490          | 0.189                           |
| anti-apoptosis                   | 29                 | 3.71E-14        | 1.06E-12                        |

\* *P-values were obtained using the gene list included in PPI network as a background list based on fisher's exact test.* # *Benjamini–Hochberg–Yekutieli procedure controls the false discovery rate (FDR).*

Table 4-4-2 The enrichment results of KEGG pathways of the top300 genes

| <i>Pathways</i>            | <i>Gene Symbol</i>                                                                                                                                                                                                           | <i>P-value*</i> | <i>BenjaminiFDR<sup>#</sup></i> |
|----------------------------|------------------------------------------------------------------------------------------------------------------------------------------------------------------------------------------------------------------------------|-----------------|---------------------------------|
| Prostate cancer            | HRAS, IKBKG, E2F1, CHUK, RAF1, EGFR, EP300, RELA, IGF1, CDKN1B, CDKN1A, EGF, CTNNB1, CREBBP, AR, INS, CCND1, ERBB2, PTEN, BCL2, MAP2K1, CDK2, MDM2, IKBKB, RB1, CREB1, AKT1, TP53, GRB2, MAPK3, NFKB1, NFKBIA, PIK3R1, MAPK1 | 4.57E-21        | 1.35E-19                        |
| p53 signaling pathway      | CCND1, PTEN, CASP8, CHEK2, CDK2, CDKN2A, MDM2, IGF1, CDKN1A, TP53, CASP3, CDK1, CYCS, FAS, ATM, CCNB1                                                                                                                        | 6.65E-07        | 2.31E-06                        |
| Cell cycle                 | CHEK2, E2F1, EP300, CDKN2A, CDKN1B, CDKN1A, CDK1, SKP1, TGFB1, CREBBP, PCNA, CCND1, CDK2, MDM2, RB1, ABL1, TP53, CUL1, ATM, SMAD3, HDAC1, YWHAZ, SMAD4, CCNB1, YWHAG, CCNH, MYC, SMAD2                                       | 2.70E-11        | 1.87E-10                        |
| TGF-beta signaling pathway | EP300, TNF, BMP4, BMP2, SP1, SKP1, IFNG, TGFB1, CUL1, PPP2CB, RHOA, CREBBP, SMAD3, MAPK3, SMAD4, MYC, MAPK1, SMAD2                                                                                                           | 9.82E-07        | 3.31E-06                        |
| Wnt signaling pathway      | JUN, CSNK2A1, CCND1, CSNK2A2, RAC2, MAPK8, PRKCA, EP300, PRKACA, RUVBL1, TP53, CTNNB1, SKP1, CUL1, PPP2CB, RHOA, CREBBP, SMAD3, SMAD4, RAC1, MYC, SMAD2                                                                      | 1.77E-05        | 4.85E-05                        |
| Focal adhesion             | JUN, HRAS, MAPK8, RAF1, EGFR, PRKCA, SHC1, IGF1, EGF, CTNNB1, VEGFA, RHOA, ACTB, CCND1, ERBB2, SRC, PTK2, PTEN, RAC2, BCL2, MAP2K1, AKT1, ITGB1, GRB2, MAPK3, FYN, ACTG1, RAC1, PIK3R1, CDC42, MAPK1                         | 3.52E-08        | 1.54E-07                        |
| Adherens junction          | CSNK2A1, SRC, ERBB2, RAC2, CSNK2A2, EGFR, EP300, CTNNB1, RHOA, CREBBP, SMAD3, MAPK3, SMAD4, FYN, INSR, ACTG1, ACTB, PTPN6, RAC1, CDC42, CDH1, MAPK1, SMAD2                                                                   | 6.16E-12        | 5.59E-11                        |
| ErbB signaling pathway     | JUN, HRAS, PTK2, SRC, ERBB2, MAPK8, RAF1, PRKCA, EGFR, SHC1, MAP2K1, CBL, ABL1, CDKN1B, EGF, CDKN1A, AKT1, PLCG1, GRB2, MAPK3, STAT5A, PIK3R1, MYC, MAPK1                                                                    | 2.16E-11        | 1.60E-10                        |

\* *P-values were obtained using the gene list included in PPI network as a background list based on fisher's exact test.* # *Benjamini-Hochberg-Yekutieli procedure controls the false discovery rate (FDR).*

Table 4-5-1 The GO Biological Process enrichment results of the top350 genes

| <i>Go term</i>                   | <i>Gene Counts</i> | <i>P-value*</i> | <i>BenjaminiFDR<sup>#</sup></i> |
|----------------------------------|--------------------|-----------------|---------------------------------|
| regulation of cell proliferation | 88                 | 6.44E-31        | 1.75E-28                        |
| programmed cell death            | 53                 | 3.50E-14        | 1.07E-12                        |
| cell cycle                       | 51                 | 2.61E-09        | 3.60E-08                        |
| cell communication               | 47                 | 3.49E-07        | 3.65E-06                        |
| signal transduction              | 107                | 2.06E-08        | 2.55E-07                        |
| DNA repair                       | 16                 | 0.00624         | 0.0313                          |
| apoptosis                        | 50                 | 1.10E-12        | 2.47E-11                        |
| protein modification process     | 77                 | 1.30E-09        | 1.86E-08                        |
| cell activation                  | 42                 | 7.79E-19        | 3.85E-17                        |
| cell growth                      | 6                  | 0.0234          | 0.102                           |
| anti-apoptosis                   | 31                 | 6.07E-14        | 1.77E-12                        |

\* *P-values were obtained using the gene list included in PPI network as a background list based on fisher's exact test.* # *Benjamini-Hochberg-Yekutieli procedure controls the false discovery rate (FDR).*

Table 4-5-2 The enrichment results of KEGG pathways of the top350 genes

| <i>Pathways</i>            | <i>Gene Symbol</i>                                                                                                                                                                                                                     | <i>P-value*</i> | <i>BenjaminiFDR<sup>#</sup></i> |
|----------------------------|----------------------------------------------------------------------------------------------------------------------------------------------------------------------------------------------------------------------------------------|-----------------|---------------------------------|
| Prostate cancer            | HRAS, IKBKG, E2F1, CHUK, RAF1, EGFR, EP300, RELA, IGF1, CDKN1B, CDKN1A, EGF, CTNNB1, CREBBP, AR, INS, CCND1, ERBB2, PTEN, BCL2, MAP2K1, CDK2, MDM2, HSP90AA2, IKBKB, RB1, CREB1, AKT1, TP53, GRB2, MAPK3, NFKB1, NFKBIA, PIK3R1, MAPK1 | 7.64E-20        | 1.85E-18                        |
| p53 signaling pathway      | CCND1, PTEN, CASP8, CHEK2, CDK2, CDKN2A, MDM2, IGF1, CDKN1A, TP53, CASP3, CDK1, CYCS, FAS, GADD45A, ATM, CCNB1                                                                                                                         | 9.87E-07        | 3.73E-06                        |
| Cell cycle                 | CHEK2, E2F1, EP300, CDKN2A, CDKN1B, CDKN1A, CDK1, SKP1, TGFB1, GADD45A, CREBBP, PLK1, PCNA, CCND1, CDK2, MDM2, RB1, ABL1, TP53, CUL1, ATM, SMAD3, HDAC1, YWHAZ, SMAD4, HDAC2, CCNB1, YWHAG, MAD2L1, CCNH, MYC, SMAD2                   | 1.24E-12        | 1.67E-11                        |
| TGF-beta signaling pathway | EP300, TNF, BMP4, BMP2, SP1, SKP1, IFNG, TGFB1, CUL1, PPP2CB, RHOA, CREBBP, SMAD3, MAPK3, SMAD4, MYC, MAPK1, SMAD2                                                                                                                     | 9.18E-06        | 2.78E-05                        |
| Wnt signaling pathway      | JUN, CSNK2A1, CCND1, CSNK2A2, RAC2, MAPK8, PRKCA, EP300, PRKACA, RUVBL1, TP53, CTNNB1, SKP1, CUL1, PPP2CB, RHOA, CREBBP, SMAD3, SMAD4, RAC1, MYC, SMAD2                                                                                | 1.93E-04        | 4.75E-04                        |
| Focal adhesion             | JUN, HRAS, MAPK8, RAF1, EGFR, PRKCA, SHC1, IGF1, EGF, CTNNB1, VEGFA, RHOA, ACTB, CCND1, ERBB2, SRC, PTK2, PTEN, RAC2, BCL2, MAP2K1, ITGB3, AKT1, ITGB1, GRB2, MAPK3, FYN, ACTG1, RAC1, PIK3R1, CDC42, MAPK1                            | 4.13E-07        | 1.66E-06                        |
| Adherens junction          | CSNK2A1, SRC, ERBB2, RAC2, CSNK2A2, EGFR, EP300, CTNNB1, RHOA, CREBBP, SMAD3, MAPK3, SMAD4, FYN, INSR, ACTG1, ACTB, PTPN6, RAC1, CDC42, CDH1, MAPK1, SMAD2                                                                             | 1.58E-10        | 1.36E-09                        |
| ErbB signaling pathway     | JUN, HRAS, PTK2, SRC, ERBB2, MAPK8, RAF1, PRKCA, EGFR, SHC1, MAP2K1, CBL, ABL1, CDKN1B, EGF, CDKN1A, AKT1, PLCG1, GRB2, MAPK3, STAT5A, PIK3R1, MYC, MAPK1                                                                              | 5.99E-10        | 4.26E-09                        |

\* *P-values were obtained using the gene list included in PPI network as a background list based on fisher's exact test.* <sup>#</sup> *Benjamini-Hochberg-Yekutieli procedure controls the false discovery rate (FDR).*
